# Supplementary material for: Identification and Functional Analysis of a Defensin CcDef2 from Coridius chinensis
Source: Int J Mol Sci. 2022 Mar 3;23(5):2789. doi: 10.3390/ijms23052789 (PMC8911331; doi:10.3390/ijms23052789)
Supplement: Supplementary file 1 [file ijms-23-02789-s001.zip › ijms-1600351-supplementary.pdf]

M G S S H H H H H H S S G L V P ↓ R G S H M  
 ATGGGCAGCAGCCATCATCATCATCACAGCAGCGGCTGGTGCCGCGCGGCAGCCATATG

Protein      A T C D A L S F Q S K W I T I N H S A C A I H C I A K G Y K  
 Original 1    GCCACTTGCAGCAGCACTCAGCTTCCAATCCAAGTGGATCACCATAAACCACTCAGCATGCGCCATCCACTGCATCGCCAAAGGATACAAG  
 Optimized    GCCACCTGCGATGCCCTGAGTTTCAGAGCAAATGGATTACCATTAAATCATAGTGCATGCGCAATTCATTGCATTGCCAAAGGTTATAAA

Protein      G G Q C K N T V C H C R K G G G G S G G G G S G G G G S A T  
 Original 91    GGTGGTCAATGTAAGAACACTGTCTGTCACTGCAGGAAGGGCGGCGGTGGTAGCGGCGGCGGTGGTAGCGGCGGCGGTGGTAGCGCCACT  
 Optimized    GGCGGTCAGTGCAAAATACCGTGTGTCAATTGCCGCAAGGCGGCGGTGGTAGCGGCGGCGGTGGTAGCGGCGGCGGTGGTAGCCACC

Protein      C D A L S F Q S K W I T I N H S A C A I H C I A K G Y K G G  
 Original 181    TGCAGCAGCACTCAGCTTCCAATCCAAGTGGATCACCATAAACCACTCAGCATGCGCCATCCACTGCATCGCCAAAGGATACAAGGGTGGT  
 Optimized    TCGATGCCCTGAGTTTCAGAGCAAATGGATTACCATTAAATCATAGTGCATGCGCAATTCATTGCATTGCCAAAGGTTATAAGGCGGT

Protein      Q C K N T V C H C R K G G G G S G G G G S G G G G S A T C D  
 Original 271    CAATGTAAGAACACTGTCTGTCACTGCAGGAAGGGCGGCGGTGGTAGCGGCGGCGGTGGTAGCGGCGGCGGTGGTAGCGCCACTTGCAGAC  
 Optimized    CAGTGCAAAATACCGTGTGTCAATTGCCGCAAGGCGGCGGTGGTAGCGGCGGCGGTGGTAGCGGCGGCGGTGGTAGCCACCTGCCGAT

Protein      A L S F Q S K W I T I N H S A C A I H C I A K G Y K G G Q C  
 Original 361    GCACTCAGCTTCCAATCCAAGTGGATCACCATAAACCACTCAGCATGCGCCATCCACTGCATCGCCAAAGGATACAAGGGTGGTCAATGT  
 Optimized    GCCCTGAGTTTCAGAGCAAATGGATTACCATTAAATCATAGTGCATGCGCAATTCATTGCATTGCCAAAGGTTATAAGGCGGTGAGTGC

Protein      K N T V C H C R K \*  
 Original 451    AAGAACACTGTCTGTCACTGCAGGAAGTAG  
 Optimized    AAAAAATACCGTGTGTCAATTGCCGCAAAATACTCGAG

**Figure S1.** The optimized sequence of *CcDef2*. The box indicates the 6×His tag. The thrombin site is shaded and the red arrow represents the cleavage site. Mutated nucleotides are shown in red and linkers in blue. Restriction endonuclease sites (*Nde* I and *Xho* I) are indicated using underlines and the asterisk denotes the stop codon.
